# Supplementary material for: USP35 promotes the growth of ER positive breast cancer by inhibiting ferroptosis via BRD4-SLC7A11 axis
Source: PubMed Central journal article supplement — Commun Biol. 2025 Jan 16;8:64. doi: 10.1038/s42003-025-07513-1 (PMC11739500; doi:10.1038/s42003-025-07513-1), 2025-01-16
Supplement: 42003_2025_7513_MOESM2_ESM.pdf [file 42003_2025_7513_MOESM2_ESM.pdf]

## Description of Additional Supplementary Files

**File name:** Supplementary Data 1

**Description:** The numeral source data behind the graphs in the paper.
